# Supplementary material for: The reaction of 2-(tetrazol-5-yl)alkyl ketones and of 2-(tetrazol-5-yl)alkanoic acid derivatives with lead tetraacetate. A novel method of preparation of alk-2-ynyl ketones and alk-2-ynoic acid derivatives †
Source: Royal Society of Chemistry journal article supplement (doi:10.1039/b005286h), 2001-01-01
Supplement: b005286h.doc [file b005286h.doc]

# Supplementary Data

The Reaction of 2-(Tetrazol-5-yl)alkyl Ketones and of 2-(Tetrazol-5-yl)alkanoic Acid Derivatives with Lead Tetraacetate. A Novel Method of Preparation of Alk-2-ynyl Ketones and Alk-2-ynoic Acid Derivatives

József Fetter *a*, Ildikó Nagy *a*, Le Thanh Giang *a*, Mária Kajtár-Peredy *b*, Antal Rockenbauer *c*, László Korecz *b*, Károly Lempert *a,d* and Gábor Czira *e*

*a Department of Organic Chemistry, Budapest University of Technology and Economics, H-1521 Budapest, Hungary*

*b Institute of Chemistry, Chemical Research Center, Hungarian Academy of Sciences, H-1525 Budapest, Hungary*

*c Department of Physics, Budapest University of Technology and Economics, H-1521 Budapest, Hungary*

*d Research Group for Alkaloid Chemistry, Hungarian Academy of Sciences, H-1521 Budapest, Hungary*

*e Gedeon Richter Chemical Works, Ltd., H-1475 Budapest 10, Hungary*

**Dimethyl (3-methoxyanilino)malonate** 78%; mp 9697 oC (MeOH); HRMS, found M+ 253.0946, C12H15NO5  requires 253.0950; max/cm-1 (KBr) 3370 (NH), 1760, 1740 (CO2Me groups); H (CDCl3) 3.76 (3H, s; MeO, MMP),[[1]](#footnote-2) 3.82 (6H, s; 2CO2Me), 4.78 (1H, d, *J* 7.5; CH), 4.83 (1H, br d, *J* 7.5; NH), 6.21 (1H, dd, *J* 2.2, 2.3; 2-H, MMP), 6.25 (1H, ddd, *J* 8.0, 2.2, 0.8; 6-H, MMP), 6.35 (1H, ddd, *J* 8.3, 2.3, 0.8; 4-H, MMP), 7.09 (1H, dd, *J* 8.3, 8.0; 5-H, MMP, **dimethyl (*N*-chloroacetyl-3-methoxyanilino)- malonate** quantitative, oil; HRMS, found M+ 329.0663, C14H16ClNO6 requires 329.0666; max/cm-1 (film) 1750d (CO2Me groups), 1680 (Amide I); H (CDCl3) 3.75 (6H, s; 2CO2Me), 3.82 (3H, s; MeO, MMP), 3.93 (2H, s; ClCH2), 5.36 (1H, s; CH), 6.96 (1H, ddd, *J* 8.4, 2.4, 1.2 ; 4-H, MMP), 7.02 (1H, m; 6-H, MMP), 7.03 (1H, m; 2-H, MMP), 7.33 (1H, m; 5-H, MMP, **dimethyl 1-(3-methoxyphenyl)-
-4-oxoazetidine-2,2-dicarboxylate** (**34**) 96%; mp 85 oC; HRMS, found M+ 293.0895, C14H15NO6 requires 293.0899; max/cm-1 (KBr) 1770 (lactam CO), 1750, 1730 (CO2Me groups); H (CDCl3) 3.55 (2H, s; 3-H2), 3.79 + 3.86 (together 9H, 2s; 3MeO), 6.68 (1H, ddd, *J* 8.4, 2.5, 0.9; 4-H, MMP), 6.99 (1H, ddd, *J* 8.0, 2.0, 0.9; 6-H, MMP), 7.17 (1H, dd, *J* 2.5, 2.0; 2-H, MMP), 7.21 (1H, dd, *J* 8.4, 8.2; 5-H, MMP and **methyl 1-(3-methoxyphenyl)-4-oxoazetidine-2-carboxylate** (**35**) 85%, oil; HRMS, found M+ 235.0840 C12H13NO4 requires 235.0846; max/cm-1 (film) 1760/1750d (lactam CO + CO2Me); H (CDCl3) 3.15 + 3.37 (together 2H, *AB*M, *J*gem 15.1, *J*vic 2.7, 6.0, respectively; 3-H2), 3.79 + 3.80 (together 6H, 2s; 2OMe), 4.49 (1H, AB*M*, *J* 6.0, 2.7; 2-H), 6.66 (1H, ddd, *J* 8.2, 2.5, 0.9; 4-H, MMP), 6.78 (1H, ddd, *J* 7.9, 2.0, 0.9; 6-H, MMP), 7.00 (1H, dd, *J* 2.5, 2.0; 2-H, MMP), 7.21 (1H, dd, *J* 8.2, 7.9; 5-H, MMP) were obtained as described in literature34 for the preparation of their PMP isomers.

**1-(3-Methoxyphenyl)-4-oxoazetidine-2-carboxylic acid** (**36**) 88%; mp 154155 oC; HRMS, found M+ 221.0688, C11H11NO4 requires 221.0688; max/cm-1 (KBr) 1760 (lactam CO), 1720 (CO2H); H (CDCl3 + DMSO-d6) 3.15 + 3.37 (together 2H, *AB*M, *J*gem 15.0, *J*vic 2.7, 6.0, respectively; 3-H2), 3.79 (3H, s; MeO), 4.44 (1H, AB*M*, *J* 6.0, 2.7; 2-H), 6.64 (1H, ddd, *J* 8.2, 2.5, 0.9; 4-H, MMP), 6.84 (1H, ddd, *J* 8.0, 2.0, 0.9; 6-H, MMP), 7.04 (1H, dd, *J* 2.5, 2.0; 2-H, MMP), 7.21 (1H, dd, *J* 8.2, 8.0; 5-H, MMP) was obtained as described in literature35 for the preparation of its PMP isomer.

**4-Chloroacetyl-1-(3-methoxyphenyl)azetidin-2-one** (**37**)

A suspension of carboxylic acid **36** (2.22 g, 10 mmol) in benzene (10 cm3), containing one drop of DMF was refluxed for 45 min with thionyl chloride (2.34 cm3, 20 mmol). The mixture was evaporated to dryness. The residue was dissolved in CCl4 (50 cm3). The solution was treated with ethereal diazomethane (*ca.* 20 mmol) with ice-water cooling. After 15 min conc. HCl was added. The major part of the product (1.6 g) separated within minutes in crystalline form. The filtrate was evaporated to dryness and the residue was taken up in diethyl ether to afford a second fraction (0.8 g) of the title compound which, according to TLC (DCMacetone, 10:0.5) proved identical with the first. Total yield 2.4 g (95%), mp 147150 oC; HRMS, found M+ 253.0507, C12H12ClNO3 requires 253.0506; max/cm-1 (KBr) 1770sh, 1750 (lactam CO + Amide I); H (CDCl3) 3.07 + 3.48 (together 2H, *AB*M, *J*gem 15.2, *J*vic 2.8, 6.5, respectively; 3-H2), 3.80 (3H, s; MeO), 4.18 + 4.60 (2H, 2d, J 15.5; CH2Cl), 4.87 (1H, AB*M,* 6.5, 2.8; 4-H), 6.666.71 (2H, m; 4-H + 6-H, MMP), 6.95 (1H, dd; 2-H, MMP), 7.23 (1H, dd; 5-H, MMP).

**4-Cyanoacetyl-1-(3-methoxyphenyl)azetidin-2-one** (**39**), mixture of the ketone (minor) and enol forms (major component in CDCl3 + DMSO-d6 solution)

A mixture of chloroketone **37** (24.6 g, 97 mmol), methanol (370 cm3), water (370 cm3) and sodium cyanide (16.6 g, 194 mmol) was stirred for 2 h at room temperature. The mixture was cooled in an ice-water bath and acidified under a hood with conc. HCl to afford part (10.2 g, mp 186188oC) of the title compound as a crystalline precipitate. The methanol content of the filtrate was distilled off and the resulting aqueous solution was extracted with EtOAc. The EtOAc solution was extracted with 1N NaOH. The alkaline solution was acidified with conc. HCl with ice-water cooling to afford a second fraction
(6.8 g, mp 180182 oC) of the title compound. The two fractions were combined and recrystallized from dioxane. Total yield 17.0 g (72%), mp 192194 oC; HRMS, found M+ 244.0849, C13H12N2O3requires 244.0848; max/cm-1 (KBr) 2240w (CN), 1760/1740 d (lactam CO + Amide I); H (CDCl3 + DMSO-d6)[[2]](#footnote-3)† 3.12 + 3.37 (2H; 3-H2), 3.78 (3H, s; MeO), 4.05.1 2H, m; 4-H + C(OH)=C*H*, 6.64 (1H, ddd; 4-H, MMP), 6.87 (1H, ddd; 6-H, MMP), 6.96 (1H, dd; 2-H, MMP), 7.21 (1H, dd; 5-H, MMP).

**5-Cyanoacetyl-1-(3-methoxyphenyl)pyrrolidin-2-one** (**40**)

60% NaH (7.0 g, 175 mmol) was added to a solution of ester **38**2 (21.8 g, 87.5 mmol) in acetonitrile (220 cm3). The mixture was slowly heated to its boiling point, refluxed for 45 min and evaporated to dryness. The residue was taken up in 1N aqueous NaOH (200 cm3). The resulting solution was washed with EtOAc, acidified with ice-water cooling with conc. HCl and extracted with EtOAc. The organic layer was dried and evaporated to dryness. The residue was taken up in diethyl ether whereby it partly crystallized. The crystals were filtered off to afford 13.7 g (60.5%) of the title compound in almost pure form, mp 105oC. An aliquot was recrystallized for analytical purposes; mp 108oC; HRMS, found M+ 258.1007, C14H14N2O3 requires 258.1004; max/cm-1 (KBr) 2250w (CN), 1720, 1700 (lactam CO + Amide I); H (CDCl3), 2.052.80 (4H, m; 3-H2 + 4-H2), 3.35 + 3.53 (together 2H, 2d, J 19.4; CH2CN), 3.81 (3H, s; MeO), 4.99 (1H, dd, *J* 9.0, 5.0; 5-H), 6.77 (1H, ddd; 4-H, MMP), 6.86 (1H, ddd; 6-H, MMP), 7.12 (1H, dd; 2-H, MMP), 7.28 (1H, dd; 5-H, MMP).

**1-Cyanoethyl phenyl ketone** (**41b**)

A mixture of propiononitrile (2.2 g, 40 mmol), methyl benzoate (5.45 g, 40 mmol), dry THF (50 cm3) and 60% NaH (in paraffin oil; 2.9 g, 122 mmol) was refluxed for 5h until, according to TLC, the reaction was complete. The mixture was cooled to 0 oC, acidified with conc. HCl and evaporated to dryness. The residue was thoroughly triturated with water and the aqueous phase was extracted with EtOAc. The EtOAc solution was dried and evaporated to dryness. The residue was distilled at 400 Pa to afford 4.4 g (77%) of the oily title compound, max/cm-1 (film) 2240 (CN), 1700 (CO); the 1H NMR spectrum was identical with the reported spectrum.36

Similarly obtained were cyanomethyl phenyl ketone (**41a**; 72%), (1-cyano-1-phenylmethyl) phenyl ketone (**41e**; 66%), [1-cyano-1-(4-methoxyphenyl)-methyl] phenyl ketone (**41f**; 73%) and cyanomethyl cyclohexyl ketone (**41h**; 55%) which, according to their mps, IR and/or 1H NMR spectra, proved identical with the compounds described in literature, see refs. 37, 37a, 38 and 39, respectively.

**1-Cyano-1-methylethyl phenyl ketone** (**41c**)

Methyl iodide (18.6 g, 130 mmol) was added dropwise to a boiling methanolic (60 cm3) solution of cyanoketone **41a** (6.0 g, 41 mmol) and 97% NaOMe (5.1 g, 91 mmol). The crude product was isolated by conventional work-up and purified by repeated distillations at *ca.* 200 Pa to afford 1.8 g (25%) of the title compound as an oil H (CDCl3; Bruker AW-80) 1.68 (6H, s; 2Me), 7.37.6 (3H, m; 3-H + 4-H + 5-H, Ph), 8.058.25 (2H, m; 2-H + 6-H, Ph), identical with the reported40  spectrum.

**2-Cyano-*N*-methylpropananilide** (**41n**)

A mixture of 2-cyanopropanoic acid (1.55 g, 15.7 mmol), carbonyl diimidazole (2.8 g, 17.3 mmol) and dry THF (20 cm3) was stirred at room temperature until the evolution of CO2 ceased. *N*-Methylaniline (1.7 g, 16 mmol) was added dropwise with continuous stirring. Stirring was continued until, according to TLC, the reaction was complete. The solvent and excess *N*-methylaniline were distilled off and the residue was taken up in DCM. The solution was washed successively with 1M HCl and water, dried and evaporated to dryness to afford 2.5 g (85%) of the crude title compound as a gum max/cm-1 (KBr) 2230 (CN), 1660 (Amide I) which was converted without purification into compound **7n** (see below).

**2**-**Cyano-*N-*(3-methoxyphenyl)propanamide** (**41o**)

A mixture of 2-cyanopropanoic acid (2.0 g, 20 mmol), triphenylphosphane (5.8 g, 22 mmol),
3-methoxyaniline (2.7 g, 22 mmol), Et3N (2.0 g, 20 mmol), CCl4 (4 cm3) and acetonitrile (40 cm3) was stirred for 12 h at room temperature. Kieselgel 60 G (Merck; 15g) was added and the mixture was evaporated to dryness. The residue was transferred onto a column of the same adsorbent and worked up by c.c. (hexane  EtOAc, 10:3) to afford the title compound 2.5 g, 61.5%; mp 120 oC; HRMS, found M+ 204.0897, C11H12N2O2 requires 204.0899; max/cm-1 (KBr) 3310 (NH), 2260 (CN), 1690 (Amide I) ; H (CDCl3) 1.67 (3H, d, *J* 7.4; C*H*3CH), 3.57 (1H, q, *J* 7.4; CH3C*H*), 3.80 (3H, s; OMe), 6.73 (1H, ddd, *J* 8.4, 2.5, 0.9; 4-H, MMP), 7.00 (1H, ddd, *J* 7.9, 2.0, 0.9; 6-H, MMP), 7.22 (1H, dd, *J* 2.5, 2.0; 2-H, MMP), 7.24 (1H, dd, *J* 8.4, 7.7; 5-H, MMP), 7.85 (1H, br s, NH).

**2-Cyano-*N*-(4-methoxyphenyl)propanamide** (**41p**) 59%; mp 138140 oC; HRMS, found M+ 204.0896, C11H12N2O2 requires 204.0899; max/cm-1 (KBr) 3280 (NH), 2260 (CN), 1660 (Amide I) ; H (CDCl3) 1.67 (3H, d, *J* 7.4; C*H*3CH), 3.56 (1H, q, *J* 7.4; CH3C*H*), 3.80 (3H, s; MeO), 6.88 + 7.39 (together 4H, AA'BB'; PMP), 7.80 (1H, br s; NH) was similarly prepared but work-up was different. Thus, the reaction mixture was evaporated to dryness and the residue was crystallized from methanol; the crystalline product was washed successively with a small amount of ice-cold methanol and diethyl ether.

**Conversion of cyanoketones 39 and 40, some cyano compounds 41 and compound 42 into the corresponding tetrazole derivatives 2a, 2b, 7 and 17, respectively; AlCl3****NaN3 method**17

AlCl3 (1.1 mol-equivalent) was added with stirring and ice-water cooling to dry THF (57 cm3/mmol cyano derivative) under Ar. Stirring was continued for 15 min, the cooling bath was removed, NaN3 (4.5 mol-equivalent) and, after 15 min, the cyano compounds **41a****41c**, **41e**, **41f**, **41g**,19 **41h**, **41r**21 and **42**20
(1 mol-equivalent), respectively, were added with continuous stirring. The mixtures were refluxed until the reactions were complete, and evaporated to dryness. The residues were taken up in water, and thoroughly triturated. The resulting suspensions were acidified (pH 1) with conc. HCl. The crystalline products (except for the **r** series, see below) were filtered off and washed successively with 1N HCl and water. In the **e****g** series the products thus obtained were not pure and had to be purified by c.c. DCM, followed by DCMacetone (7:0.5  7:1) and/or DCMMeOH (7:0.5  7:1). In the **f** series further purification proved to be necessary (see below).

The following products were obtained:

**1-(3-methoxyphenyl)-4-(tetrazol-5-ylacetyl)azetidin-2-one** (**2a**) reaction time 3 h, yield 68%; mp 195 oC (MeOH); HRMS, found M+ 287.1007, C13H13N5O3 requires 287.1018; max/cm-1 (KBr) 31002700 (NH), 1750 (lactam CO), 1725 (CO) ; H (DMSO-d6) 3.14 + 3.53 (21H, *AB*M, *J*gem15.1, *J*vic 2.8 and 5.6 respectively; 3-H2), 3.74 (3H, s; OMe), 4.46 + 4.68 (21H, 2d, *J* 18.3; COCH2), 5.13 (1H, AB*M*, *J* 5.6 and 2.8; 4-H), 6.68 (1H, m; 4-H, MMP), 6.896.93 (2H, m; 2-H + 6-H, MMP), 7.25 (1H, m; 5-H, MMP), 16.2 (1H, br s; NH);

**1-(3-methoxyphenyl)-5-(tetrazol-5-ylacetyl)pyrrolidin-2-one** (**2b**) reaction time 12 h, quantitative; mp 158 oC; HRMS, found M+ 301.1163, C14H15N5O3requires 301.1175; max/cm-1 (KBr) 31002500 (NH), 1720 (CO), 1690 (lactam CO); H (CDCl3 + DMSO-d6) 2.152.71 (4H, m; 3-H2+ 4-H2), 3.79 (3H, s; OMe), 4.14 + 4.26 (21H, 2d, *J* 17.7; COCH2), 5.11 (1H, dd, *J* 9.2, 4.1; 5-H), 6.72 (1H, ddd, *J* 8.3, 2.5, 0.9; 4-H, MMP), 6.90 (1H, ddd, *J* 8.1, 2.1, 0.9; 6-H, MMP), 7.17 (1H, dd, *J* 2.5, 2.1; 2-H, MMP), 7.24 (1H, dd, *J* 8.3, 8.1; 5-H, MMP), the NH signal was blurred by the signal of water; in addition, signals of the enol form, present in an amount of *ca.* 10%, were detected; C (CDCl3 + DMSO-d6) 21.48 (C3), 30.61 (C4), 34.54 (CO*C*H2), 55.27 (OMe), 66.72 (C5), 107.87 (C2, MMP), 111.09 (C4, MMP), 113.37 (C6, MMP), 129.78 (C5, MMP), 139.07 (C1, MMP), 150.22 (C5, tetrazole), 160.05 (C3, MMP), 174.04 (C2), 201.43 (CO, ketone);

**phenyl tetrazol-5-ylmethyl ketone** (**7a**) reaction time 5 h, 86% yield; mp 187188 oC (MeOH) ; HRMS (FAB), (M+H)+ 189.0771, C9H9N4O requires 189.0776; max/cm-1 (KBr) 36003300 (NH), 1690 (CO) ; H (CDCl3 + DMSO-d6) 4.77 (2H, s; CH2), 7.55 (2H, m; 3-H + 5-H, Ph); 7.67 (1H, m; 4-H, Ph), 8.08 (2H, m; 2-H + 6-H, Ph), the NH signal was blurred by the water signal;

**phenyl 1-(tetrazol-5-yl)ethyl ketone** (**7b**) reaction time 2.5 days, 25% yield; mp 121122 oC; HRMS, found M+ 202.0849, C10H10N4O requires 202.0855; max/cm-1 (KBr) 35003300 (NH), 1650 (CO) ; H (DMSO-d6) 1.59 (3H, d, *J* 7.2; *Me*CH), 5.47 (1H, q, *J* 7.2; MeC*H*), 7.56 + 7.68 + 8.04 (2H + 1H + 2H, 3m; Ph), 16.4 (br s; NH + water);

**1-methyl-1-(tetrazol-5-yl)ethyl phenyl ketone** (**7c**) reaction time 3 days, 71% yield; mp 134137 oC; HRMS (FAB), found (M+H)+ 217.1087, C11H13N4O requires 217.1089; max/cm-1 (KBr) 36003200 (NH), 1690 (CO); H (CDCl3) 1.85 (6H, s; 2Me), 7.28 (2H, m; 3-H + 5-H, Ph), 7.42 (1H, m; 4-H, Ph) ; 7.51 (2H, m; 2-H + 6-H, Ph), 14.5 (br s; NH + water) ; C (CDCl3) 26.10 (2Me), 46.08 (*C*Me2), 128.60 + 128.95 + 133.04 + 134.70 (Ph), 161.21 (C5, tetrazole), 200.27 (CO);

**phenyl phenyl(tetrazol-5-yl)methyl ketone** (**7e**) reaction time 5.5 days, 8.7% yield; mp 173 oC; HRMS, found M+ 264.1004, C15H12N4O requires 264.1011; max/cm-1 (KBr) 3400 br (NH), 1670 (CO) ; H (CDCl3 + DMSO-d6)[[3]](#footnote-4)‡ 6.68 (1H, s; COCH), 7.28 (1H, s; 4-H, Ph"), 7.35 (2H, m; 3-H + 5-H, Ph"), 7.46 (2H, m; 3-H + 5-H, Ph'), 7.47 (2H, m; 2-H + 6-H, Ph"), 7.58 (1H, m; 4-H, Ph'), 8.05 (2H, m; 2-H + 6-H, Ph');

**(4-methoxyphenyl)(tetrazol-5-yl)methyl phenyl ketone** (**7f**) reaction time 6.5 days; the product resulting from work-up by c.c. was not pure; the dark brown oil was therefore triturated with water; the mixture was made alkaline by adding 1M NaOH and extracted with EtOAc; the aqueous phase was acidified (pH 1) with conc. HCl with ice-water cooling; the oily precipitate was taken up in DCM, dried and evaporated to dryness to afford an amorphous solid foam which resisted all attempts at crystallization; yield 24.5%; HRMS, found M+ 294.1116, C16H14N4O2 requires 294.1117; max/cm-1 (KBr) 33002800 (NH), 1680 (CO); H(CDCl3) 3.70 (3H, s; MeO), 6.72 (1H, s; COCH), 6.80 + 7.33 (22H, AA'BB', *J*o 8.9; PMP), 7.45 (2H, m; 3-H + 5-H, Ph), 7.57 (1H, m; 4-H, Ph), 8.04 (2H, m; 2-H + 6-H, Ph), 13.5 (br; NH);

**(4-nitrophenyl)(tetrazol-5-yl)methyl phenyl ketone** (**7g**) and its enol reaction time 3 days, yield of the ketone 51%; mp 196 oC; HRMS, found M+ 309.0847, C15H11N5O3 requires 309.0862; max/cm-1 (KBr) 31002400 (NH), 1680 (CO); H (DMSO-d6) 7.14 (1H, s; COCH), 7.52 (2H, m; 3-H + 5-H, Ph), 7.64 (1H, m; 4-H, Ph), 8.06 (2H, m; 2-H + 6-H, Ph), 7.75 + 8.25 (22H, AA'BB', *J*o 8.8; 4-nitrophenyl), 16.5 (1H, br; NH). The aqueous-acidic filtrate of crude ketone **7g** deposited colorless crystals 0.03 g, 0.52%; mp 185186 oC, max/cm-1 (KBr) 3400 br, 31002400 (OH+NH), no absorption in the carbonyl region; H (DMSO-d6) identical with that of the ketone of the enol;

**cyclohexyl tetrazol-5-ylmethyl ketone** (**7h**) reaction time 9 h, yield 74%; mp 135137 oC; HRMS, found M+ 194.1165, C9H14N4O requires 194.1168; max/cm-1 (KBr) 32002800 (NH), 1720 (CO); H
(DMSO-d6) 1.102.00 (10H, m; 2-H2 + 3-H2 + 4-H2 + 5-H2 + 6-H2, cyclohexyl), 2.60 (1H, br m; 1-H, cyclohexyl), 4.34 (2H, s; COCH2), the NH signal blurred by the signal of water present in the solvent was extremely broad;

***N*-(tetrazol-5-ylacetyl)piperidine** (**7r**) reaction time 14 h; modified work-up: since the product did not separate on acidification, the aqueous acidic mixture was extracted with DCM. The DCM solution was dried and evaporated to dryness. The dry residue was triturated with diethyl ether to afford a solid material which was purified by c.c. (DCMacetone, 10:1, followed by DCMMeOH, 10:1) to afford the title compound in 66% yield; mp 136138 oC; HRMS, found M+ 195.1123; C8H13N5O requires 195.1120; max/cm-1 (KBr) 33003100 (NH), 1620 (Amide I); H (CDCl3) 1.551.75 (6H, m; 3-H2 + 4-H2 + 5-H2, piperidine), 3.59 + 3.69 (22H, 2m; 2-H2 + 6-H2, piperidine), 4.22 (2H, s; COCH2), 12.5 br (NH) ; C (CDCl3) 24.10 + 25.41 + 26.29 (C3 + C4 + C5, piperidine), 29.00 (CO*C*H2), 43.87 + 47.56 (C2 + C6, piperidine), 150.61 (C5, tetrazole), 165.25 (NC=O);

**phenyl 2-(tetrazol-5-yl)ethyl ketone** (**17**) reaction time 5 days, yield 82%; mp 167168 oC; HRMS (FAB), found (M+H)+ 203.0928, C10H11N4O requires 203.0933; max/cm-1 (KBr) 33002800 (NH), 1680 (C=O); H (CDCl3 + DMSO-d6) 3.34 + 3.60 (22H, 2t; CH2CH2), 7.48 (2H, m; 3-H + 5-H, Ph), 7.60 (1H, m; 4-H, Ph), 7.98 (2H, m; 2-H + 6-H, Ph), NH signal blurred by the water signal.

**Conversion of cyano compounds 41n, 41o and 41p into the corresponding tetrazole derivatives 7**; **NH4Cl**  **NaN3 method**

Mixtures of the cyano compounds (1 mol equivalent), NaN3 and NH4Cl (1.11.6 mol-equivalent) and anhydrous DMF (0.851.2 cm3/mmol cyano compound) were heated at 95 oC with continuous stirring until the reactions were complete. The solvent was distilled off at reduced pressures. The residues *A* were worked up as described at the individual compounds. The following products were obtained:

***N*-methyl-2-(tetrazol-5-yl)propionanilide** (**7n**) reaction time 16 h; work-up of residue *A*: the residue was taken up in water, the mixture was extracted with EtOAc, the EtOAc solution was washed with 0.1 M HCl, dried and evaporated to dryness to afford the yellowish crystals of the title compound which were washed with a small amount of diethyl ether; yield 30%, mp 180183 oC (PriOH); HRMS, found M+ 231.1121, C11H13N5O requires 231.1120; max/cm-1 (KBr) 3100 br (NH), 1620 (Amide I), H (CDCl3 + DMSO-d6 ) 1.51 (3H, d, *J* 7.3; CH*Me*), 3.32 (3H, s; *N*-Me), 4.28 (1H, q, *J* 7.3; MeC*H*), 7.26 (2H, m; 2-H + 6-H, Ph), 7.40 (1H, m; 4-H, Ph), 7.45 (2H, m; 3-H + 5-H, Ph), 15.5 br (NH);

***N*-(3-methoxyphenyl)-2-(tetrazol-5-yl)propionamide** (**7o**) reaction time 7 days; work-up of residue *A*: water was added to the residue; a dark brown oil, insoluble in water, was obtained which gradually crystallized to afford the first fraction of the title compound; the aqueous filtrate was extracted with DCM and the DCM solution was washed with 1M NaOH; the combined aqueous phases were acidified (pH 1) with conc. HCl and extracted with EtOAc; the EtOAc solution was evaporated to dryness to afford the second fraction of the title compound; total yield 76%; mp 169170 oC; HRMS, found M+ 247.1068; C11H13N5O2 requires 247.1069; max/cm-1 (KBr) 3350 (CONH), 31002400 (NH, tetrazole) 1670 (Amide I); H (CDCl3 + DMSO-d6) 1.71 (3H, d, *J* 7.3; *Me*CH), 3.77 (3H, s; MeO), 4.39 (1H, q, *J* 7.3; MeC*H*), 6.63 (1H, ddd, *J* 8.2, 2.5, 1.0; 4-H, MMP), 7.11 (1H, ddd, *J* 8.0, 2.0, 1.0; 6-H, MMP), 7.18 (1H, dd, *J* 8.2, 8.0; 5-H, MMP), 7.35 (1H, dd, *J* 2.5, 2.0; 2-H MMP), 9.8 (1H, br s; NHCO), the tetrazole NH signal was blurred by the signal of water present in the solvent;

***N*-(4-methoxyphenyl)-2-(tetrazol-5-yl)propionamide** (**7p**) reaction time 60 h; work-up of residue *A*: the residue was taken up in water and the mixture was acidified to afford the crystalline title compound which was filtered off and washed successively with 1M HCl and water; yield 60%, mp 158163 oC (dec; from EtOAc) ; HRMS, found M+ 247.1065, C11H13N5O2 requires 247.1069; max/cm-1 (KBr) 3300 (CONH), 31002500 (tetrazole NH), 1680 (Amide I) ; H (CDCl3 + DMSO-d6) 1.69 (3H, d, *J* 7.2; *Me*CH), 3.77 (3H, s; MeO), 4.37 (1H, q, *J* 7.2; MeC*H*), 6.82 + 7.51 (22H, AA'BB'; PMP), 9.9 (1H, br; NHCO) ; the tetrazole NH signal was blurred by the signal of water present in the solvent.

(**Tetrazol-5-yl)acetanilide** (**7l**) **and *N*-methyl-(tetrazol-5-yl)acetanilide** (**7m**)

(a) A mixture of compound **7i**14  (1.4 g, 9 mmol) and aniline (11 cm3, 12 mmol) was stirred for 2 h at 150oC, allowed to cool and triturated with 1M HCl. The crystalline product was filtered off and washed successively with 1M HCl, water, DCM and diethyl ether to afford compound **7l** 0.8 g, 44%, mp 192 oC; max/cm-1 (KBr) 3280 (CONH), 32002800 (tetrazole NH), 1660 (Amide I), identical with the spectrum described in literature16.

(b) A mixture of compound **7i**14 (4.4 g, 28.2 mmol) and *N*-methylaniline (3.7 cm3, 35 mmol) was stirred for 6 h at 180 oC under Ar and allowed to cool. EtOAc (40 cm3) was added. The mixture was washed with 1M HCl, dried and evaporated to dryness. The residue was dissolved in 3% aqueous NaHCO3. The solution was washed with EtOAc, acidified (pH 1) with conc. HCl and extracted with DCM. The DCM solution was dried and evaporated to dryness to afford a light brown oil which gradually crystallized on scatching to give compound **7m** 2.65 g, 43.2%; mp 112113 oC (EtOAc); HRMS, found M+ 217.0956, C10H11N5O requires 217.0964; max/cm-1 (KBr) 33003000 (NH), 1650 (Amide I); H (CDCl3) 3.42 (3H, s; *N*-Me), 3.93 (2H, s; COCH2), 7.27 (2H, m; 2-H + 6-H, Ph), 7.44 (1H, m; 4-H, Ph), 7.49 (2H, m; 3-H +
5-H, Ph), 13.3 (br; NH).

**(1-Methyltetrazol-5-yl)methyl phenyl ketone** (**7d**)

Ethereal diazomethane (20 mmol) was dropwise added to a suspension of compound **7a** (1.9 g, 1 mmol) in DCM (15 cm3) with continuous stirring and ice-water cooling. Stirring was continued until the reaction was complete. The excess diazomethane was destroyed by adding AcOH. The mixture was evaporated to dryness to afford a crystalline product (1.1 g). 0.8 g of this product was worked up by c.c. (DCM, followed by DCMacetone, 7:0.5) to afford three crystalline fractions. The last (most polar) fraction 0.37 g, 24%; mp 156158 oC, lit.13a mp 157158 oC and13b 156157 oC; max/cm-1 (KBr) 1695, lit13a (DCM) 1695; H (CDCl3 + DMSO-d6) 4.04 (3H, s; *N*-Me), 4.85 (2H, s; COCH2) 7.57 (2H, m; 3-H + 5-H, Ph), 7.66 (1H, m; 4-H, Ph), 8.05 (2H, m; 2-H + 6-H, Ph), identical with the published13b spectrum] proved to be the required title compound. The first fraction (0.21 g, 14%) was shown by its IR spectrum to be the 2-methyl isomer, while the second fraction (0.12 g, 8%) proved to be a mixture of the two isomers.

**Bromo-(tetrazol-5-yl)methyl phenyl ketone** (**31**)

AlCl3 (50 mg, 0.37 mmol) and subsequently dropwise bromine (8.9 g, 55.5 mmol) in DCM (18 cm3) were added to a suspension of compound **7a** (3.0 g, 15.9 mmol) in DCM (35 cm3) with continuous stirring. The mixture was gently heated until the reaction was complete, and evaporated to dryness. The residue was boiled up with EtOAc (50 cm3). The mixture was allowed to cool to afford the title compound 3.8 g, 90%; mp 186187 oC (EtOAc); HRMS, found M+ 265.9842, C9H7BrN4O requires 265.9803; max/cm-1 (KBr) 32002600 (NH), 1680 (C=O); H (CDCl3 + DMSO-d6) 7.22 (1H, s; CHBr), 7.55 (2H, m; 3-H +
5-H, Ph), 7.67 (1H, m; 4-H, Ph), 8.12 (2H, m; 2-H + 6-H, Ph), the NH signal was blurred by the signal of water present in the solvent.

**Additional references to the electronic supplement**

1. Z. Tombor, Z. Greff, J. Nyitrai, M. Kajtár-Peredy, *Liebigs Ann. Chem.*, 1955, 825.
2. J. Fetter, Le Thanh Giang, T. Czuppon, K. Lempert, M. Kajtár-Peredy, G. Czira, *Tetrahedron*, 1994, **50**, 4185.
3. M. Kohler, K.-H. Schuster, G. Simchen, *Liebigs Ann. Chem.* 1978, 1946.
4. (a) C. I. Eby, C. R. Hauser, *J. Am. Chem. Soc.*, 1957, **79**, 723; (b) G. S. King, P. D. Magnus, H. S. Rzepa, *J. Chem. Soc. Perkin Trans. 1*, 1972, 437.
5. (a) C. E. Cook, R. C. Corley, E. Wall, *J. Org. Chem.*,1965, **30**, 4114; (b) J. M. Kern, J. D. Sauer, R. Federlin, *Tetrahedron*, 1982, **38**, 3023.
6. R. S. Long, *J. Am. Chem. Soc.*, 1947, **69**, 990.
7. T. Chiba, M. Okamoto, *J. Org. Chem.*, 1991, **56**, 6163.

1.  MMP and PMP mean 3- and 4-methoxyphenyl, respectively, throughout [↑](#footnote-ref-2)
2. † The signals of the enol form are given. Due to mutual interconversion of the tautomeric forms, most signals are broad. [↑](#footnote-ref-3)
3. ‡ The terminal phenyl group is designed by Ph', the other by Ph". [↑](#footnote-ref-4)
